# Supplementary material
Source: MDPI journal article supplement (https://www.mdpi.com/2076-3417/11/13/6150)
Supplement: s1 [file s1]

## Supplementary materials

**Table S1.** GLM analysis for the effect of treatments on pollen adhesion or pollen germination rate (% of germinated pollen) on stigmas. See Materials and methods for treatments definitions. Values are reported as mean  $\pm$  s.d.;  $n = 6$ ;  $Pr > F$ : the probability that the table value for  $F$  is greater than the calculated value. Statistically different groups (post-hoc Bonferroni  $t$ -test) are marked with different letters.

| Treatment | $Pr > F$ | Adhesion                 | $Pr > F$  | Germination              |
|-----------|----------|--------------------------|-----------|--------------------------|
|           | 0.0479   |                          | $> 0.001$ |                          |
| CTRL      |          | $1684 \pm 256$ <i>a</i>  |           | $65.4 \pm 12.7$ <i>a</i> |
| GO        |          | $1404 \pm 422$ <i>ab</i> |           | $17.3 \pm 8.7$ <i>b</i>  |
| pGO       |          | $1222 \pm 127$ <i>b</i>  |           | $18.4 \pm 18.9$ <i>b</i> |

**Table S2.** GLM analysis for the effect of treatments on fresh mass (kg), length (cm), maximum circumference (cm) of fruits and number of seeds produced per fruit. See Materials and methods for treatments definitions. Values are reported as mean  $\pm$  s.d.; n: number of replicates per single treatment; Pr > F: the probability that the table value for F is greater than the calculated value. Statistically different groups (post-hoc Bonferroni *t*-test) are marked with different letters.

| Treatment | Pr > F  | n | Fresh mass                  | Pr > F  | n | Length                  |
|-----------|---------|---|-----------------------------|---------|---|-------------------------|
|           | 0.0073  |   |                             | > 0.001 |   |                         |
| CTRL      |         | 5 | 437.1 $\pm$ 168.8 <i>a</i>  |         | 5 | 21.3 $\pm$ 3.1 <i>a</i> |
| GO        |         | 3 | 179.3 $\pm$ 144.4 <i>ab</i> |         | 3 | 12.8 $\pm$ 4.4 <i>b</i> |
| pGO       |         | 3 | 0.7 $\pm$ 0.3 <i>b</i>      |         | 3 | 5.2 $\pm$ 1.4 <i>b</i>  |
|           |         |   | Circumference               |         |   |                         |
|           | > 0.001 |   |                             | 0.0261  |   | Seeds per fruit         |
| CTRL      |         | 5 | 26.1 $\pm$ 5.7 <i>a</i>     |         | 5 | 37 $\pm$ 25             |
| GO        |         | 3 | 18.9 $\pm$ 6.2 <i>a</i>     |         | 3 | 0 $\pm$ 0               |
| pGO       |         | 3 | 2.0 $\pm$ 0.5 <i>b</i>      |         | 3 | 0 $\pm$ 0               |
